# Supplementary figures and images for: Effects of Lactic Acid Bacteria-Inoculated Corn Silage on Bacterial Communities and Metabolites of Digestive Tract of Sheep
Source: MDPI journal article supplement (doi:10.3390/fermentation8070320), 2022-07-08

## Genus

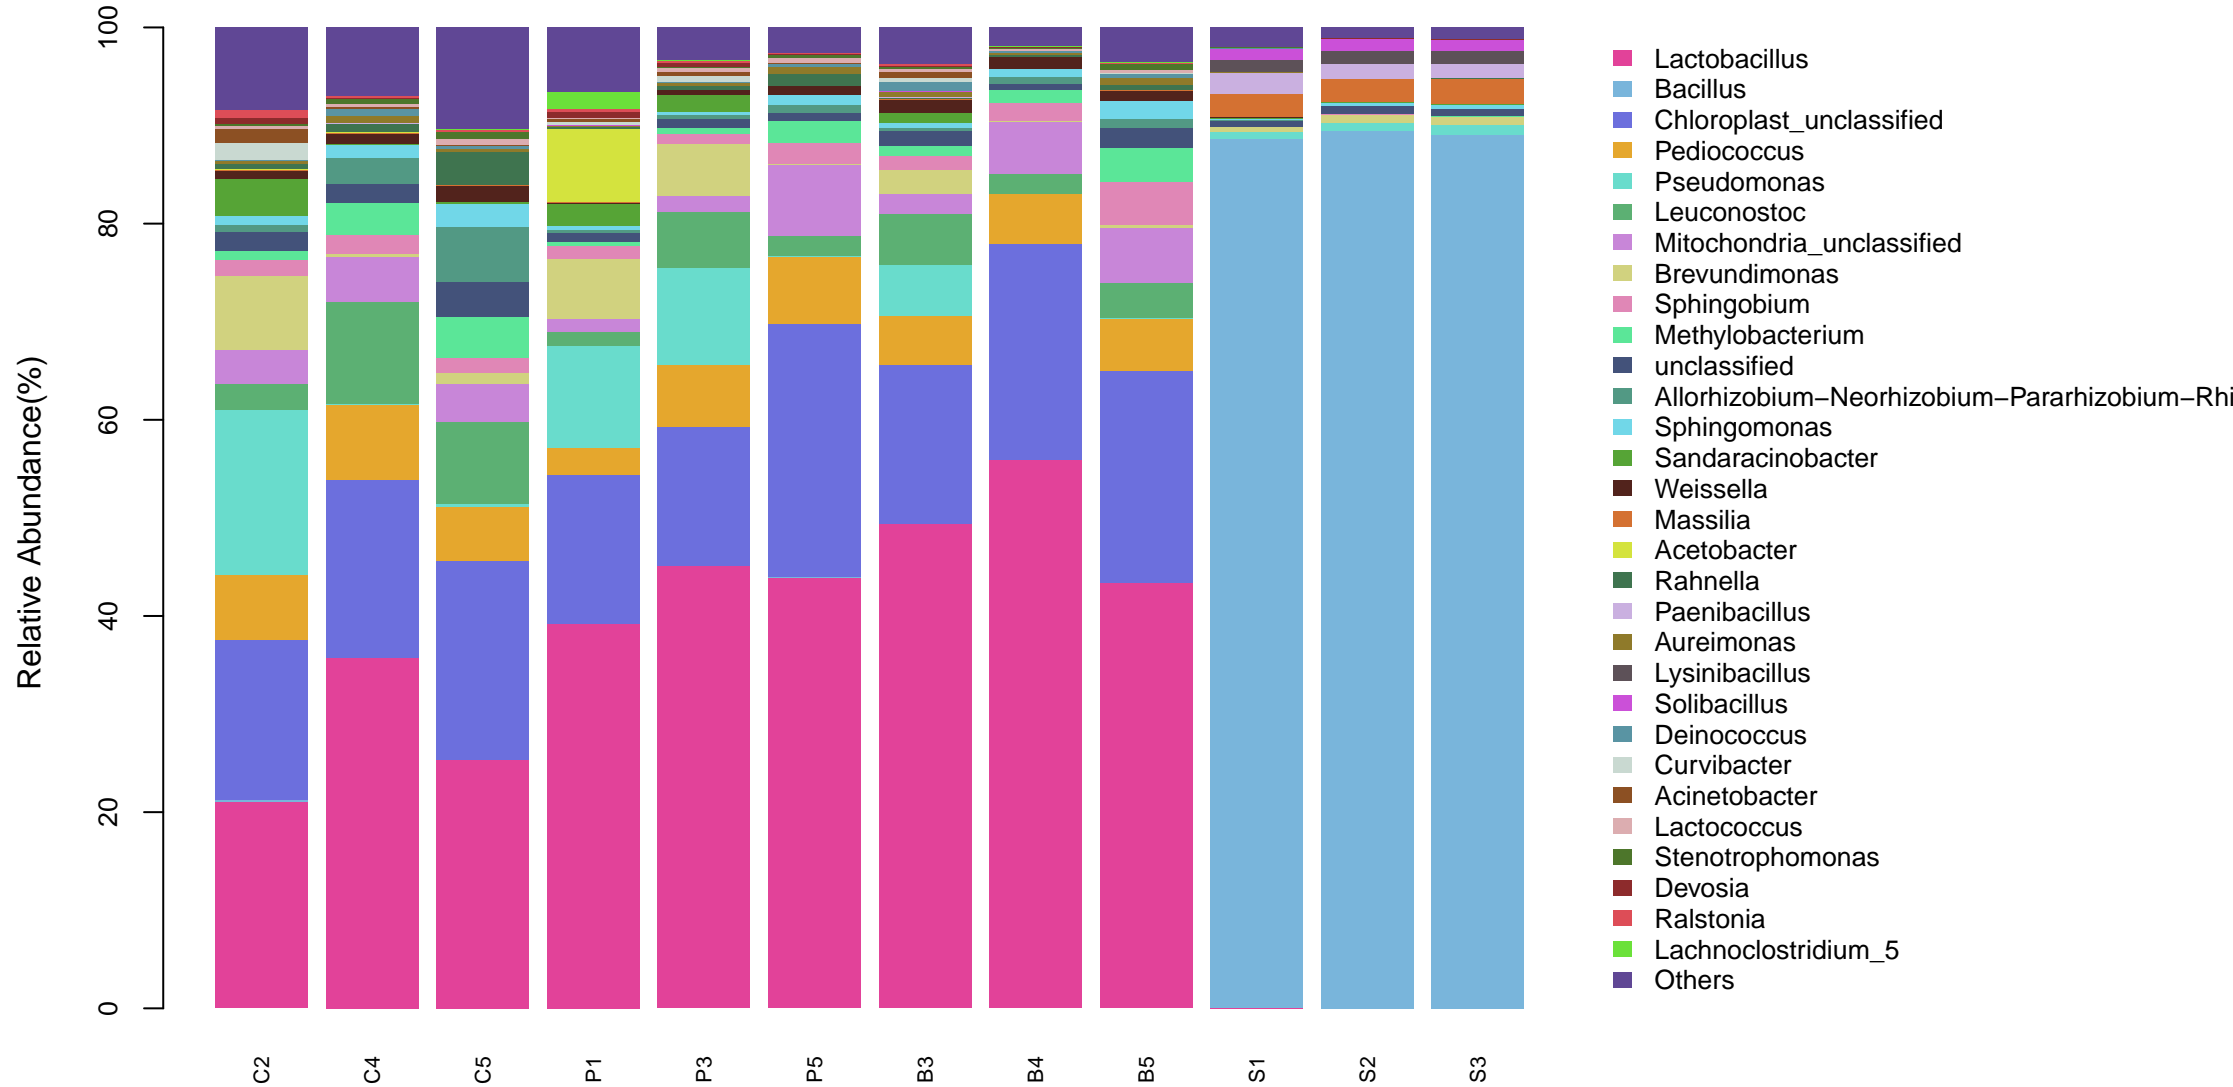

Supplement: s1 [file s1]
